# Supplementary material for: Transcriptomic and epigenetic profiling of ‘diffuse midline gliomas, H3 K27M-mutant’ discriminate two subgroups based on the type of histone H3 mutated and not supratentorial or infratentorial location
Source: Springer Nature journal article supplement (doi:10.1186/s40478-018-0614-1), 2018-11-05

**A**

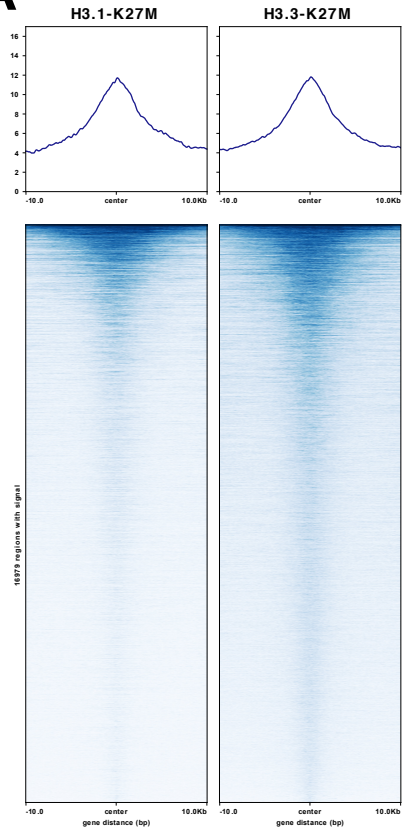

**B**

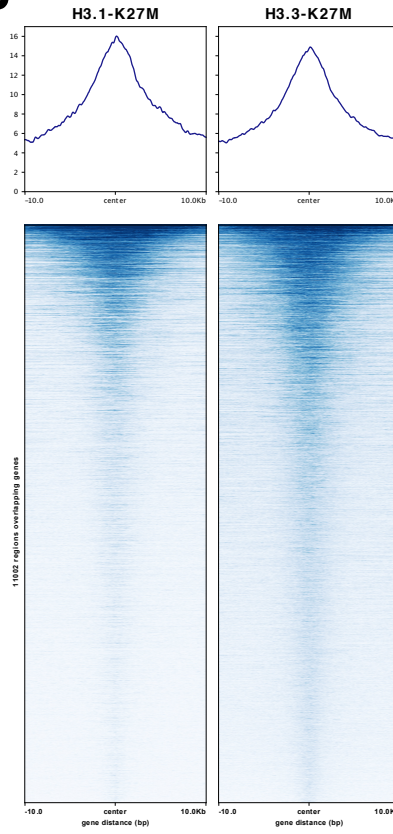

**C**

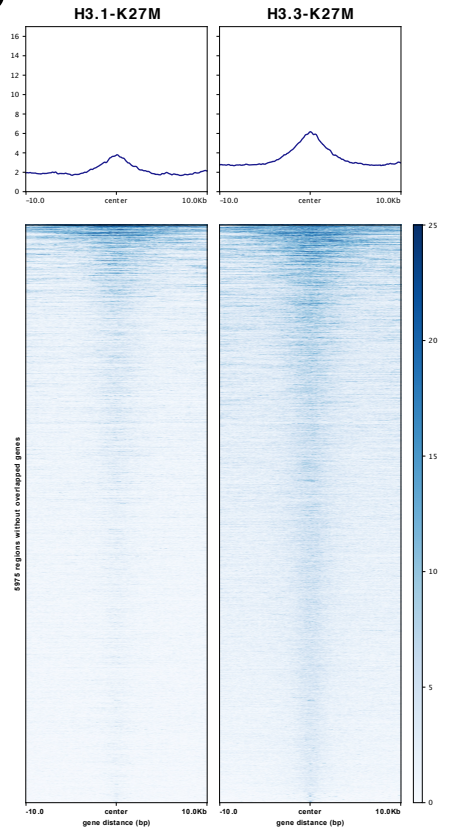

**D**

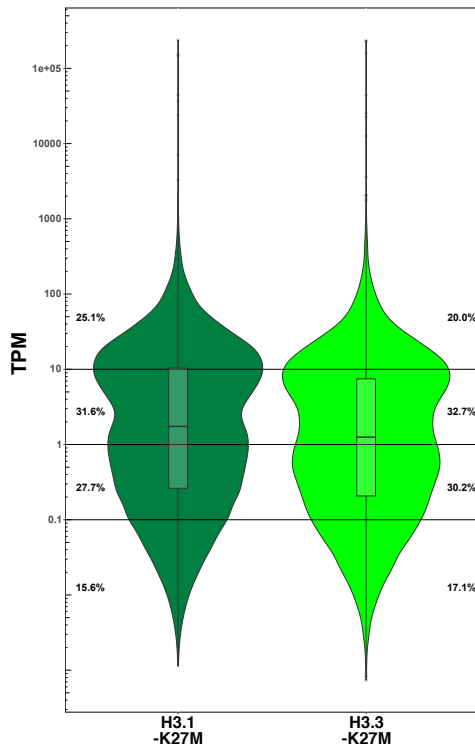

Supplement: MOESM6 [file 25666546]
